# Supplementary material for: Structural and Vibrational Study on Monomer and Dimer Forms and Water Clusters of Acetazolamide
Source: Hindawi journal article supplement (doi:10.1155/2013/538917), 2013-01-01
Supplement: f1 [file 538917.f1.doc]

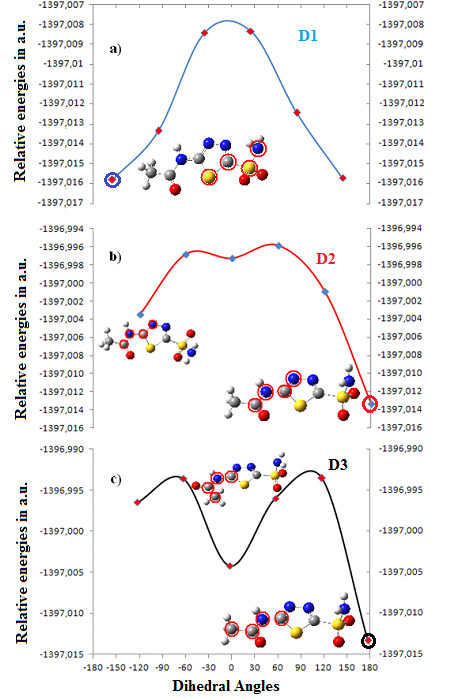


**Fig. S1.** PES scan for acetazolamide calculated with dihedral angles D1(1S-2C-6S-9N),
D2(4N-5C-12N-14C) and D3(5C-12N-14C-16C) at the B3LYP/6-31G++(d,p) method.


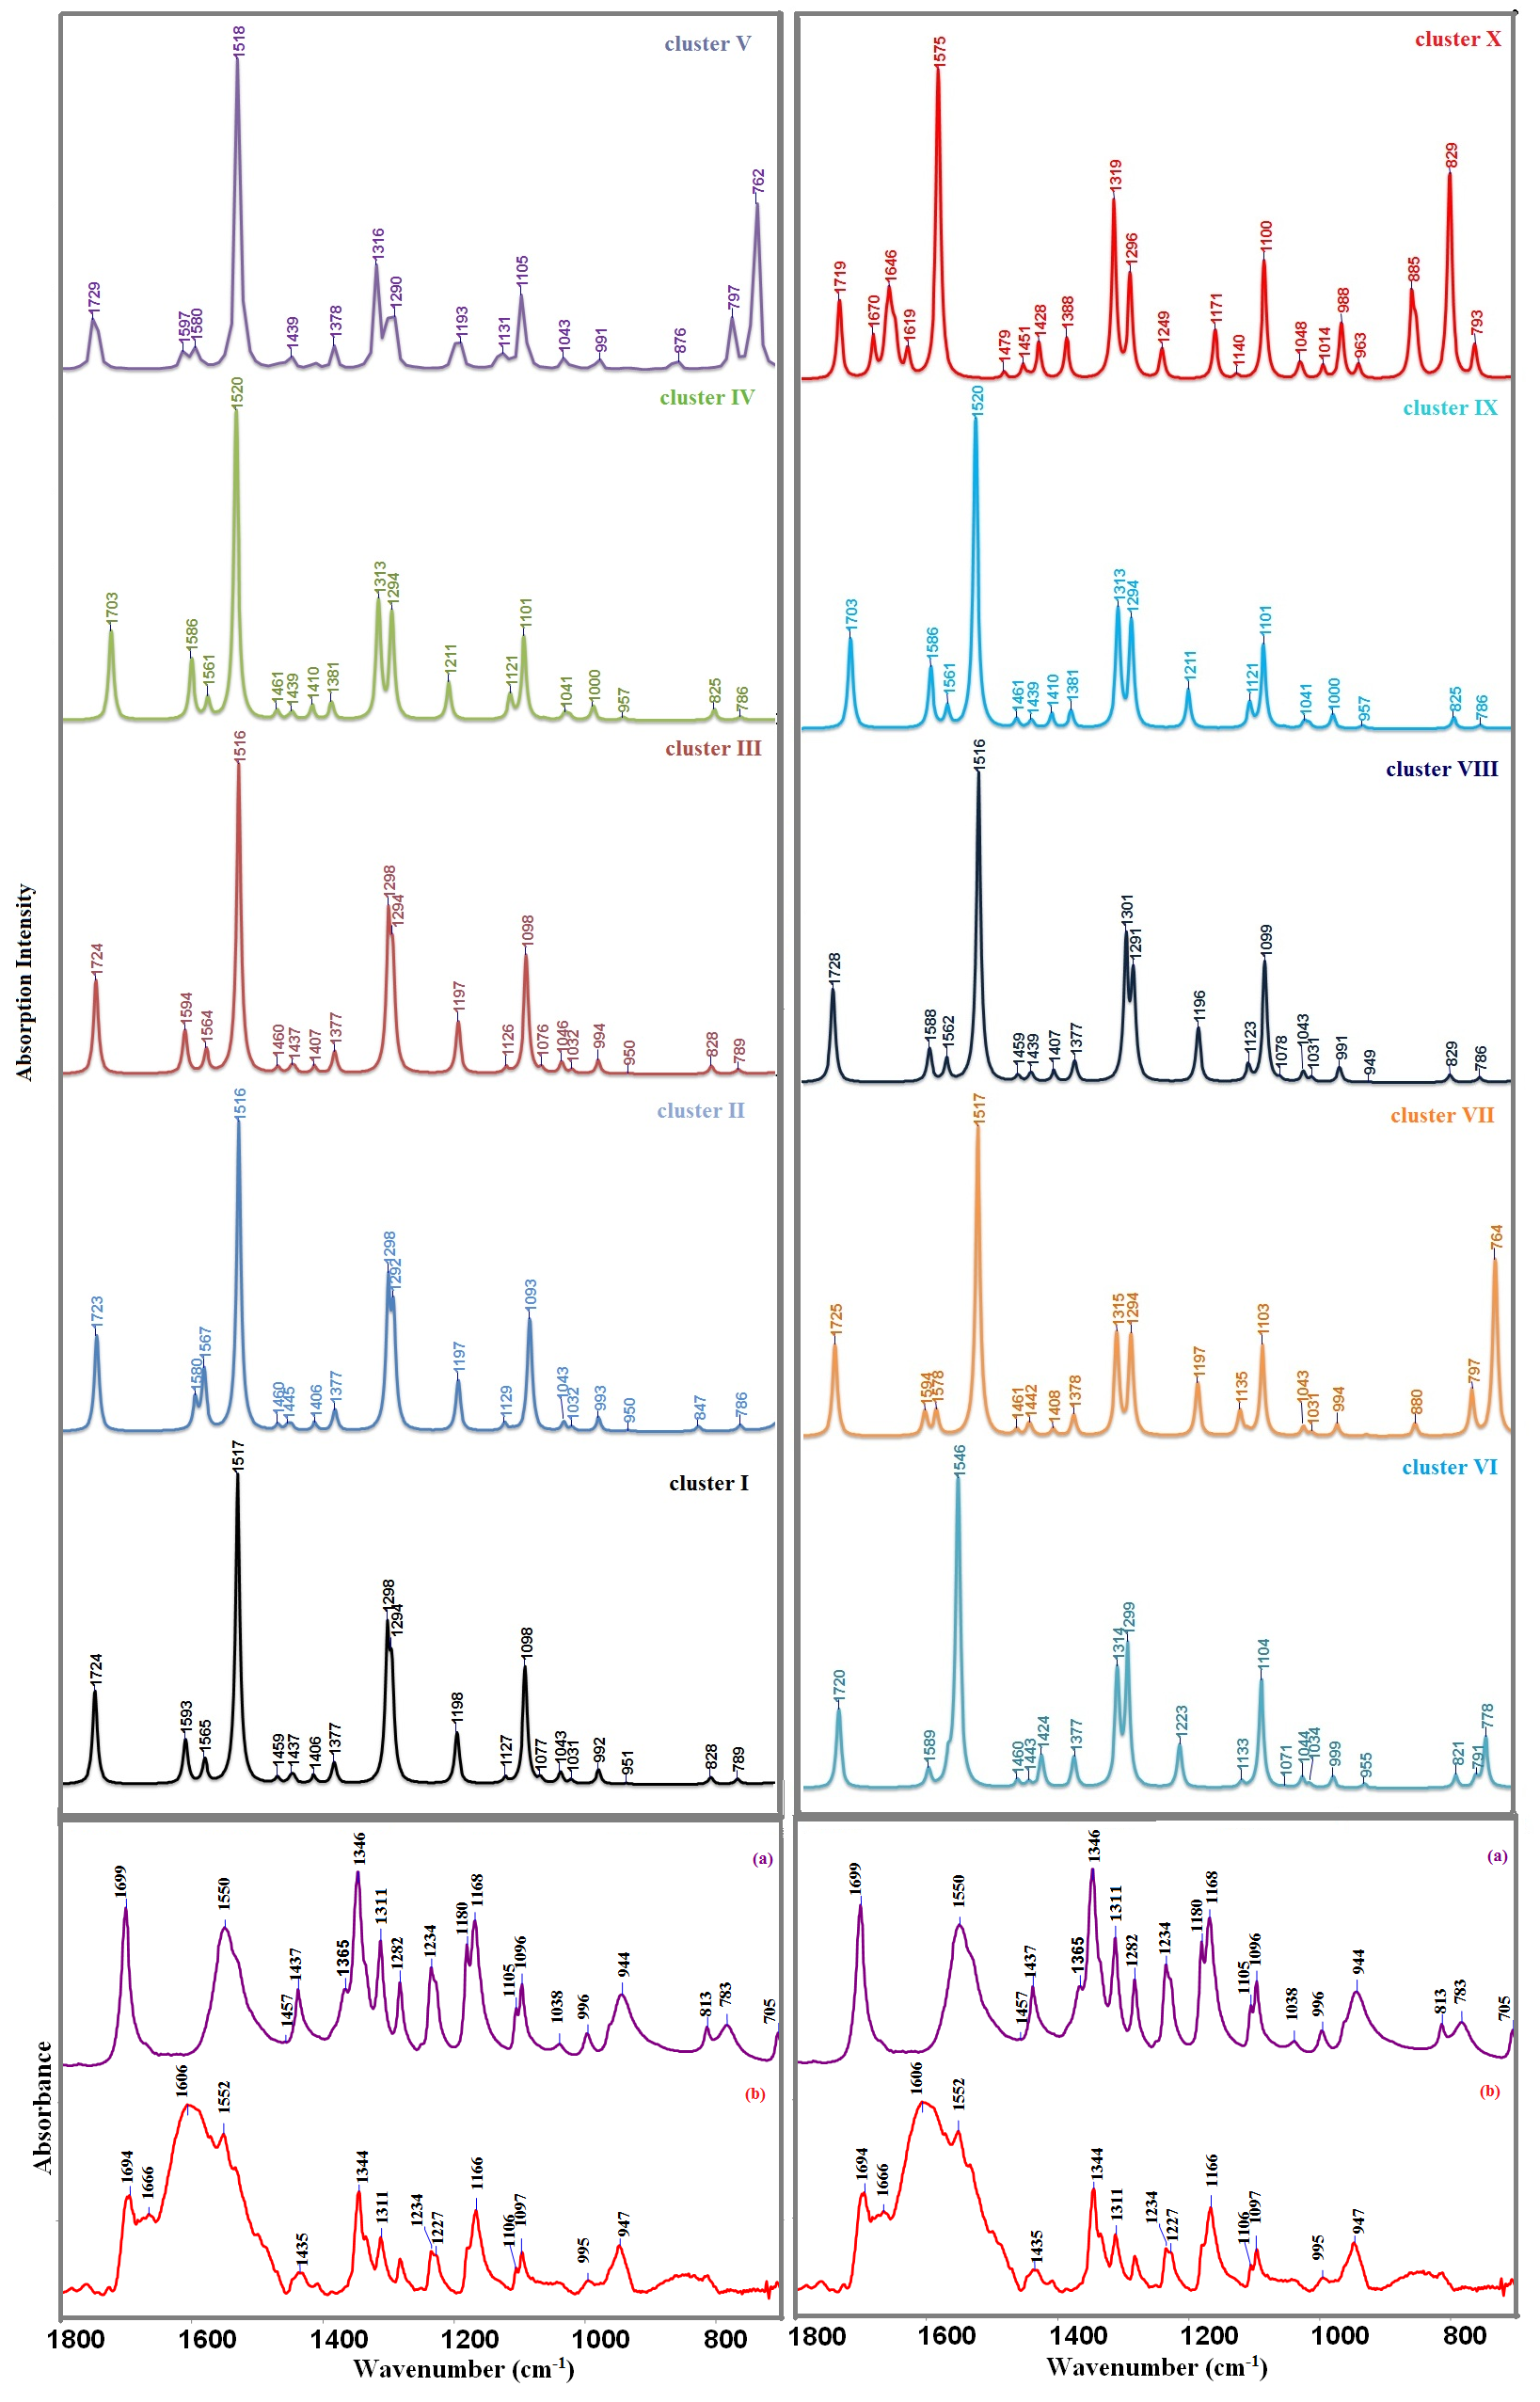


**Fig. S2**. The 1800-800 cm-1 region of IR spectra of solid acetazolamide (a) and its water solution after subtraction of water bands (b) and calculated (scaled) absorption intensity spectra of H2O clusters (I-X) of acetazolamide, respectively.


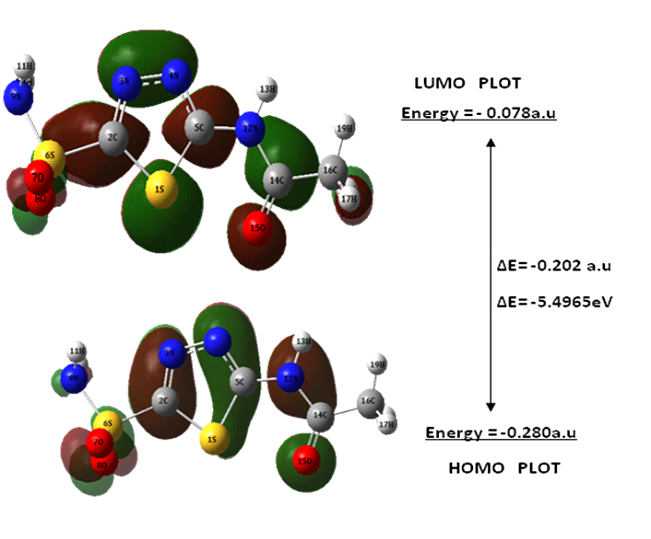


**Fig. S3.** The frontier molecular orbitals of acetazolamide.

| **Table S1 :** The dihedral angles D1(1S-2C-6S-9N). D2 (4N-5C-12N-14C) and D3 (5C-12N-14C-16C) which were iteratively changed by 600 for potential energy surfaces scan analysis were carried out relaxed PES scans by DFT/B3LYP/6-31G++(d,p) levels of theory for 45 different geometry with energy. | | | | | | | | | | | | | |
| --- | --- | --- | --- | --- | --- | --- | --- | --- | --- | --- | --- | --- | --- |
| **No** | **D1**  **(1-2-6-9)** | **D2**  **(4-5-12-14)** | **D3**  **(5-12-14-16)** | **Energy**  **(kcal/mol)** | **ΔE**  **(kcal/mol)** | | **No** | **D1**  **(1-2-6-9)** | **D2**  **(4-5-12-14)** | **D3**  **(5-12-14-16)** | **Energy (kcal/mol)** | **ΔE**  **(kcal/mol)** | |
| **1** | **-155.4** | **179.9** | **177.3** | **-876641.3867** | | 0 | **25** | 84.6 | 59.9 | -2.7 | -876632.0157 | | 9 |
| **2** | -95.4 | 179.9 | 177.3 | -876639.8454 | | 2 | **26** | -95.4 | 59.9 | -2.7 | -876632.5621 | | 9 |
| **3** | 84.6 | 179.9 | 177.3 | -876639.2721 | | 2 | **27** | 84.6 | -60.0 | -2.7 | -876632.0223 | | 9 |
| **4** | -35.4 | 179.9 | 177.3 | -876636.765 | | 5 | **28** | -95.4 | -60.0 | -2.7 | -876632.0665 | | 9 |
| **5** | 24.6 | 179.9 | 177.3 | -876636.7092 | | 5 | **29** | 24.6 | 179.9 | -2.7 | -876632.6232 | | 9 |
| **6** | -95.4 | 0.0 | -2.7 | -876635.1099 | | 6 | **30** | -35.4 | 179.9 | -2.7 | -876632.6527 | | 9 |
| **7** | -155.4 | -120.0 | 177.3 | -876634.7102 | | 7 | **31** | -155.4 | -60.0 | 177.3 | -876631.2555 | | 10 |
| **8** | 144.6 | -120.0 | 177.3 | -876634.3201 | | 7 | **32** | -155.4 | 0.0 | 177.3 | -876631.6206 | | 10 |
| **9** | 144.6 | 119.9 | 177.3 | -876634.1951 | | 7 | **33** | 144.6 | 59.9 | 177.3 | -876631.1258 | | 10 |
| **10** | 84.6 | 0.0 | -2.7 | -876634.8659 | | 7 | **34** | 144.6 | 119.9 | -122.7 | -876631.5412 | | 10 |
| **13** | -95.4 | 179.9 | -2.7 | -876634.1313 | | 7 | **35** | -155.4 | 119.9 | -122.7 | -876631.6679 | | 10 |
| **14** | -95.4 | -120.0 | 177.3 | -876633.6282 | | 8 | **36** | -155.4 | 59.9 | -2.7 | -876631.6366 | | 10 |
| **15** | -155.4 | 119.9 | 177.3 | -876633.8883 | | 8 | **37** | 24.6 | 59.9 | -2.7 | -876631.1626 | | 10 |
| **16** | -35.4 | 0.0 | -2.7 | -876633.8003 | | 8 | **38** | -35.4 | 59.9 | -2.7 | -876630.9798 | | 10 |
| **17** | 24.6 | 0.0 | -2.7 | -876633.7847 | | 8 | **39** | -155.4 | -60.0 | -2.7 | -876631.4908 | | 10 |
| **18** | -155.4 | 179.9 | -2.7 | -876633.2481 | | 8 | **40** | 144.6 | -60.0 | -2.7 | -876631.7688 | | 10 |
| **19** | 144.6 | 179.9 | -2.7 | -876633.5949 | | 8 | **41** | -95.4 | -120.0 | -2.7 | -876631.4477 | | 10 |
| **20** | 84.6 | 179.9 | -2.7 | -876633.8468 | | 8 | **42** | 84.6 | -120.0 | -2.7 | -876631.0153 | | 10 |
| **21** | 84.6 | -120.0 | 177.3 | -876631.9469 | | 9 | **43** | 144.6 | -120.0 | -2.7 | -876631.09 | | 10 |
| **22** | 84.6 | 119.9 | 177.3 | -876632.4929 | | 9 | **44** | -95.4 | 119.9 | -2.7 | -876630.9962 | | 10 |
| **23** | -95.4 | 119.9 | 177.3 | -876632.037 | | 9 | **45** | 144.6 | 0.0 | 177.3 | -876631.461 | | 10 |
| **24** | 144.6 | 59.9 | -2.7 | -876632.0209 | | 9 |  |  |  |  |  | |  |

| **Table S2.** An optimized molecular structure for **monomer**, **Dimer I** and **Cluster (VI and X** ) of Acetazolamide were obtained as part of the DFT calculations | | | | | | | | | |
| --- | --- | --- | --- | --- | --- | --- | --- | --- | --- |
| ***Bond*** | **Mono** | **Dimer I** | **Cluster**  **VI** | **Cluster**  **X** | **Calc.**  ***Ref.11*** | **Calc.**  ***Ref.24*** | **Exp**  ***Ref.12*** | **Exp.**  ***Ref.9*** | **Exp.**  ***Ref.10*** |
| **S1-C2** | 1.7523 | 1.7538 | 1.7532 | 1.7503 | 1.761 | 1.750 | 1.728 | 1.730 | 1.725 |
| **S1-C5** | 1.7492 | 1.7498 | 1.7492 | 1.7565 | 1.760 | 1.749 | 1.737 | 1.724 | 1.727 |
| **C2-N3** | 1.2985 | 1.2968 | 1.2976 | 1.3004 | 1.291 | 1.292 | 1.283 | 1.294 | 1.293 |
| **C2-S6** | 1.8092 | 1.8086 | 1.8079 | 1.8094 | 1.791 | 1.811 | 1.767 | 1.774 | 1.779 |
| **N3-N4** | 1.3667 | 1.3655 | 1.3647 | 1.3633 | 1.361 | 1.365 | 1.375 | 1.372 | 1.375 |
| **N4-C5** | **1.3115** | **1.322** | 1.3191 | 1.3203 | 1.317 | 1.306 | 1.317 | 1.311 | 1.311 |
| **C5-N12** | 1.3804 | 1.3681 | 1.3741 | 1.3728 | 1.364 | 1.379 | 1.333 | 1.369 | 1.363 |
| **S6-O7** | 1.4601 | 1.4581 | 1.4594 | 1.4643 | 1.459 | 1.452 | 1.427 | 1.426 | 1.425 |
| **S6-O8** | 1.4609 | 1.4608 | 1.4611 | 1.4747 | 1.464 | 1.453 | 1.432 | 1.425 | 1.432 |
| **S6-N9** | 1.662 | 1.6634 | 1.6633 | 1.6301 | 1.683 | 1.658 | 1.569 | 1.594 | 1.570 |
| **N9-H10** | 1.0165 | 1.0159 | 1.0163 | 1.0515 | 1.017 | - | 0.86 | 0.82 | - |
| **N9-H11** | 1.0169 | 1.0162 | 1.0169 | 1.0154 | 1.017 | - | 0.81 | 0.78 | - |
| **N12-H13** | **1.0127** | **1.0371** | 1.0264 | 1.0335 | - | - | - | 0.69 | - |
| **N12-C14** | 1.3862 | 1.3874 | 1.3844 | 1.3796 | - | 1.386 | - | 1.355 | 1.375 |
| **C14-O15** | 1.2228 | 1.2253 | 1.2249 | 1.2295 | - | 1.215 | - | 1.222 | 1.212 |
| **C14-C16** | 1.5108 | 1.5088 | 1.5102 | 1.5078 | - | 1.509 | - | 1.492 | 1.492 |
| **C16-H17** | 1.0929 | 1.0946 | 1.0944 | 1.0917 | - | - | - | 0.89 | - |
| **C16-H18** | 1.0941 | 1.0933 | 1.0929 | 1.0933 | - | - | - | 1.00 | - |
| ***Angle*** |  |  |  |  |  |  |  |  |  |
| **C2-S1-C5** | 84.5 | 84.9 | 84.7 | 84.5 | 84.7 | - | 85.9 | 85.0 | 85.2 |
| **S1-C2-N3** | 115.6 | 115.7 | 115.7 | 115.5 | 115.0 | - | 115.5 | 116.4 | 116.2 |
| **S1-C2-S6** | 123.2 | 122.7 | 123.1 | 124.1 | 121.5 | 123.0 | 121.8 | 123.1 | 121.6 |
| **N3-C2-S6** | 121.2 | 121.6 | 121.1 | 120.3 | 123.5 | 121.3 | 122.6 | 120.4 | 122.1 |
| **C2-N3-N4** | 112.6 | 112.3 | 112.4 | 112.7 | 113.5 | - | 112.5 | 111.3 | 111.6 |
| **N3-N4-C5** | 111.8 | 112.6 | 112.3 | 111.9 | 112.1 | - | 112.1 | 112.1 | 111.8 |
| **S1-C5-N4** | 115.6 | 114.6 | 114.9 | 115.3 | 114.7 | - | 114 | 115.3 | 115.2 |
| **S1-C5-N12** | 124.1 | 124.4 | 124.3 | 124.6 | 122.7 | 124.0 | 122.7 | 125.1 | 123.3 |
| **N4-C5-N12** | 120.3 | 121.1 | 120.8 | 120.1 | 122.5 | 120.4 | 123.3 | 119.6 | 121.5 |
| **C2-S6-O7** | 106.9 | 107.4 | 107.2 | 106.9 | 107.9 | - | 106.1 | 106.6 | 107.1 |
| **C2-S6-O8** | 106.5 | 105.1 | 106.0 | 105.7 | 105.6 | - | 103.6 | 105.4 | 102.9 |
| **C2-S6-N9** | 104.9 | 106.1 | 105.3 | 107.1 | 102.5 | 104.9 | 108.8 | 106.6 | 108.0 |
| **O7-S6-O8** | 122.2 | 122.9 | 122.4 | 119.7 | 122.9 | - | 120.9 | 121.2 | 120.7 |
| **O7-S6-N9** | 107.4 | 106.8 | 107.1 | 108.5 | 109.8 | - | 108.2 | 107.8 | 108.1 |
| **O8-S6-N9** | 107.6 | 107.4 | 107.6 | 108.0 | 106.4 | - | 108.7 | 108.4 | 109.3 |
| **S6-N9-H10** | 112.6 | 113.4 | 112.7 | 114.5 | 109.2 | - | - | 106.0 | - |
| **S6-N9-H11** | 112.6 | 113.1 | 112.6 | 112.0 | 110.9 | - | - | 106.0 | - |
| **H10-N9-H11** | 112.3 | 113.7 | 112.7 | 114.9 | 112.6 | - | - | 130.0 | - |
| **C5-N12-H13** | **114.6** | **115.9** | 114.7 | 114.0 | - | - | - | 115.0 | - |
| **C5-N12-C14** | 124.7 | 123.0 | 123.7 | 123.9 | - | - | - | 124.7 | 122.7 |
| **H13-N12-C14** | 120.7 | 120.9 | 121.7 | 122.0 | - | - | - | 120.0 | - |
| ***Dihedral Angle*** |  |  |  |  |  |  |  |  |  |
| **S1-C2-S6-O7** | 76.5 | 105.5 | 89.9 | -80.6 | 139.9 | 56.5 | 139.2 | - | - |
| **S1-C2-S6-O8** | -55.7 | -27.0 | -42.4 | 47.9 | 6.9 | -75.6 | 11.0 | - | - |
| **S1-C2-S6-N9(D1)** | -169.6 | -140.6 | -156.3 | 164.2 | 104.3 | 170.4 | 104.6 | - | - |
| **S1-C5-N12-C14** | -0.2 | -0.9 | 0.3 | -0.3 | - | - | - | - | - |
| **N4-C5-N12-H13** | 0.3 | -0.5 | 1.2 | -0.5 | - | - | - | - | - |
| **N4-C5-N12-C14(D2)** | -179.9 | 179.5 | -179.2 | -179.4 | - | - | - | - | - |
| **O8-S6-N9-H10** | -47.4 | -46.2 | -46.6 | -55.5 | - | - | - | - | - |
| **O8-S6-N9-H11** | -175.6 | -177.6 | -175.5 | 171.2 | - | - | - | - | - |
| **C5-N12-C14-C16(D3)** | 179.7 | -178.5 | -179.4 | -179.4 | - | - | - | - | - |

Dimer parameters found to be altered in comparison to those of monomer, due to formation of hydrogen bonding, are marked as bold.

| **Table S3.** Calculated wavenumbers (cm-1) and the total energy distribution of the vibrational modes of the four dimers of Acetazolamidea . | | | | | | | | | | | |
| --- | --- | --- | --- | --- | --- | --- | --- | --- | --- | --- | --- |
|  |  | | **DFT/B3LYP/6-31++G(d,p)** | | | | | | | |  |
|  | ***Assignment*** | ***Dimer1*** | | | ***Dimer2*** | | ***Dimer3*** | | ***Dimer4*** | | ***Acetazolamide Dimer 1***  ***PED ( 5%) Gar2ped*** |
|  |  | **cal** | | **cal-IR** | **cal** | **cal-IR** | **cal** | **cal-IR** | **cal** | **cal-IR** |  |
| 1 | **νas(NH2)** | 3484 | | 51 | 3463 | 54 | 3474 | 52 | 3444 | 48 | **νNH2(asym,) (100)** |
| 2 | **νas(NH2)** | 3484 | | 47 | 3442 | 141 | 3464 | 45 | 3444 | 57 | **νNH2(asym,) (100)** |
| 3 | **νs(NH2)** | 3364 | | 54 | 3352 | 45 | 3361 | 50 | 3254 | 661 | **νNH2(sym) (100)** |
| 4 | **νs(NH2)** | 3364 | | 37 | 3272 | 375 | 3354 | 121 | 3251 | 4 | **νNH2(sym) (100)** |
| 5 | **ν (NH)** | 3035 | | 3454 | 3450 | 65 | 3447 | 71 | 3443 | 182 | **νNH (93)** |
| 6 | **νas(CH3)** | 3015 | | 0 | 3020 | 3 | 3011 | 8 | 3014 | 5 | **νCH3(asym,) (93)** |
| 7 | **νas(CH3)** | 3014 | | 75 | 3008 | 7 | 3008 | 13 | 3014 | 6 | **νCH3(asym,) (93)** |
| 8 | **ν (NH)** | 2995 | | 1 | 3449 | 59 | 3351 | 429 | 3442 | 144 | **νNH (90)** |
| 9 | **νas(CH3)** | 2992 | | 1 | 2994 | 5 | 2997 | 1 | 2994 | 6 | **νCH3(asym,) (96)** |
| 10 | **νas(CH3)** | 2992 | | 3 | 2987 | 8 | 2994 | 3 | 2994 | 5 | **νCH3(asym,) (91)** |
| 11 | **νs(CH3)** | 2923 | | 1 | 2923 | 4 | 2925 | 2 | 2920 | 12 | **νCH3(sym,) (96)** |
| 12 | **νs(CH3)** | 2923 | | 2 | 2920 | 3 | 2924 | 4 | 2920 | 9 | **νCH3(sym,) (96)** |
| 13 | **ν (O=C)** | 1721 | | 349 | 1726 | 164 | 1720 | 102 | 1690 | 180 | **νCO (67)** |
| 14 | **ν (O=C)** | 1720 | | 0 | 1723 | 162 | 1699 | 429 | 1690 | 188 | **νCO (67)** |
| 15 | **CNH** | 1581 | | 2 | 1517 | 379 | 1534 | 692 | 1520 | 860 | **CNH(44)+ NHN(16)+ NCNH(17)** |
| 16 | **CNH+νCN** | 1565 | | 799 | 1517 | 731 | 1524 | 335 | 1514 | 149 | **CNH(20)+ νCN (20)+NHN(19)+NCNH(19)** |
| 17 | **NH2(scis,)** | 1554 | | 34 | 1576 | 35 | 1563 | 45 | 1564 | 55 | **NHH(97)** |
| 18 | **NH2(scis,)** | 1554 | | 41 | 1564 | 43 | 1561 | 44 | 1563 | 8 | **NHH(97)** |
| 19 | **as(CH3)** | 1463 | | 19 | 1460 | 12 | 1461 | 17 | 1464 | 10 | **HCH(38)+ CCH(38)** |
| 20 | **as(CH3)** | 1462 | | 1 | 1458 | 12 | 1460 | 9 | 1464 | 12 | **HCH(38)+ CCH(38)** |
| 21 | **νas(C=N)ring** | 1456 | | 1 | 1447 | 8 | 1445 | 2 | 1449 | 6 | **νCN (85)** |
| 22 | **νas(C=N)ring** | 1456 | | 7 | 1435 | 22 | 1436 | 6 | 1448 | 18 | **νCN (81)** |
| 23 | **as(CH3)** | 1449 | | 8 | 1441 | 7 | 1446 | 4 | 1440 | 8 | **HCH(54)+ CCH(36)** |
| 24 | **as(CH3)** | 1448 | | 11 | 1440 | 10 | 1441 | 14 | 1440 | 24 | **CCH(54)+HCH(36)** |
| 25 | **νs(C=N)ring** | 1439 | | 188 | 1406 | 17 | 1422 | 17 | 1407 | 8 | **νCN (60)+ NHN(6)+ NCNH(6)** |
| 26 | **νs(C=N)ring** | 1435 | | 2 | 1405 | 13 | 1407 | 7 | 1407 | 9 | **νCN (74)** |
| 27 | **s(CH3)** | 1379 | | 1 | 1377 | 39 | 1378 | 41 | 1375 | 0 | **CCH(43)+HCH(41)** |
| 28 | **s(CH3)** | 1379 | | 100 | 1375 | 40 | 1375 | 46 | 1375 | 89 | **CCH(41)+HCH(43)** |
| 29 | **νas(SO2)** | 1319 | | 228 | 1302 | 244 | 1313 | 293 | 1300 | 59 | **νSO (89)** |
| 30 | **νas(SO2)** | 1319 | | 159 | 1296 | 207 | 1310 | 109 | 1298 | 324 | **νSO (89)** |
| 31 | **νa(C-N)** | 1300 | | 485 | 1292 | 139 | 1297 | 214 | 1291 | 395 | **νCN (68)+ CNH(5)** |
| 32 | **νs(C-N)** | 1298 | | 0 | 1291 | 331 | 1292 | 143 | 1290 | 48 | **νCN (56)+ CNH(10)** |
| 33 | **νa(C-N)** | 1232 | | 3 | 1200 | 92 | 1216 | 106 | 1211 | 16 | **νCN (26)+ ν CC (12)+ NCO(12)+ NHN(6)+ NCNH(6)** |
| 34 | **νs(C-N)** | 1226 | | 209 | 1198 | 88 | 1210 | 21 | 1212 | 89 | **νCN (32)+ ν CC (10)+NHN(5)+ NCNH(5)** |
| 35 | **νs (N-N) ring** | 1134 | | 7 | 1132 | 10 | 1127 | 15 | 1123 | 17 | **νNN (64)+ NCN(8)** |
| 36 | **νs (N-N) ring** | 1132 | | 17 | 1123 | 28 | 1123 | 30 | 1122 | 32 | **νNN (62)** |
| 37 | **νs (SO2)** | 1105 | | 56 | 1104 | 248 | 1104 | 11 | 1106 | 229 | **νSO (62)+ ν NN (20)** |
| 38 | **νs(SO2)** | 1104 | | 401 | 1097 | 54 | 1102 | 380 | 1105 | 29 | **νSO (64)+ νNN (16)** |
| 39 | **ρ (NH2)** | 1063 | | 1 | 1091 | 74 | 1075 | 3 | 1087 | 139 | **SNH(84)** |
| 40 | **ρ (NH2)** | 1063 | | 3 | 1078 | 7 | 1070 | 3 | 1086 | 1 | **SNH(84)** |
| 41 | **ring+ν ring** | 1046 | | 24 | 1049 | 27 | 1044 | 10 | 1039 | 41 | **νCS (37)+ NCS(20)+ NNC(23)** |
| 42 | **ring+νring** | 1045 | | 11 | 1043 | 18 | 1042 | 17 | 1038 | 48 | **νCS (38)+ NCS(20)+ NNC(22)** |
| 43 | **ρ (CH3)** | 1036 | | 14 | 1031 | 8 | 1033 | 9 | 1036 | 0 | **CCH(73)+ NCCO(21)** |
| 44 | **ρ (CH3)** | 1036 | | 1 | 1031 | 7 | 1032 | 4 | 1035 | 8 | **CCH(73)+ NCCO(21)** |
| 45 | **ρ (CH3)** | 1009 | | 0 | 991 | 25 | 1000 | 23 | 999 | 37 | **CCH(64)+ νCC(14)** |
| 46 | **ρ (CH3)** | 1007 | | 63 | 988 | 30 | 999 | 26 | 999 | 14 | **CCH(62)+ νCC(14)** |
| 47 | **ν (C-N)+ ν (C-C)** | 953 | | 39 | 951 | 2 | 959 | 11 | 958 | 1 | **νCC (22)+ νNC (20)+NCN(7)+CNH(14)** |
| 48 | **ν (C-N)+ ν (C-C)** | 949 | | 0 | 950 | 3 | 953 | 3 | 958 | 8 | **νCC (24)+ νNC (22)+ NCN(6)+ CNH(12)** |
| 49 | **(N-H)** | 881 | | 88 | 533 | 66 | 712 | 51 | 615 | 5 | **NCNH(25)+ CCNH(20)+ NCNH(21)+ CCNH(10)+ NHN(21)** |
| 50 | **(N-H)** | 864 | | 0 | 525 | 72 | 618 | 30 | 614 | 42 | **CCNH(26)+ NCNH(28)+ CCNH(12)+NHN(28)** |
| 51 | **ν (S-N)** | 817 | | 47 | 850 | 11 | 828 | 9 | 853 | 227 | **νSN (70)** |
| 52 | **ν (S-N)** | 817 | | 34 | 827 | 12 | 823 | 34 | 853 | 34 | **νSN (71)** |
| 53 | **ring+ νring** | 798 | | 37 | 790 | 10 | 789 | 13 | 782 | 1 | **NNC(21)+ NCN(15)+ νCS(16)+ CSC(7)** |
| 54 | **ring+ νring** | 786 | | 0 | 786 | 8 | 788 | 5 | 782 | 3 | **NNC(22)+ NCN(15)+ ν CS(15)+ CSC(8)** |
| 55 | **νring(C-S)** | 683 | | 0 | 675 | 60 | 678 | 12 | 678 | 26 | **νCS (62)** |
| 56 | **νring(C-S)** | 681 | | 26 | 674 | 12 | 671 | 19 | 677 | 11 | **νCS (54)+ NCN(5)** |
| 57 | **νring(C-S)** | 661 | | 3 | 650 | 40 | 666 | 152 | 651 | 1 | **νCS (34)+ CSN(21)** |
| 58 | **νring(C-S)** | 659 | | 73 | 649 | 108 | 648 | 190 | 650 | 0 | **CS (38)+ CSN(27)** |
| 59 | **ring** | 635 | | 7 | 626 | 4 | 626 | 4 | 625 | 1 | **CNNC(61)+ NCSC(16)** |
| 60 | **ring** | 635 | | 3 | 624 | 12 | 625 | 9 | 624 | 10 | **CNNC(50)+ NCSC(17)+ CCO(8)+ OCNC(8)** |
| 61 | **w(NH2)** | 626 | | 45 | 702 | 470 | 684 | 614 | 673 | 64 | **NHH(37)+ NSO(26)+ νNS (16)** |
| 62 | **w(NH2)** | 624 | | 1210 | 683 | 363 | 644 | 233 | 669 | 143 | **NHH(38)+ NSO(20)+ νNS (12)** |
| 63 | **(O-C)** | 597 | | 2 | 610 | 19 | 569 | 13 | 544 | 16 | **OCNC(38)+ CNNC(31)+ SCNS(5)** |
| 64 | **(O-C)** | 595 | | 1 | 600 | 13 | 546 | 47 | 544 | 103 | **OCNC(30)+ CNNC(36)+ SCNS(12)** |
| 65 | **ring** | 578 | | 7 | 589 | 4 | 592 | 1 | 592 | 0 | **CNNC(44)+ OCNC(20)+ SCNS(16)** |
| 66 | **ring** | 576 | | 15 | 583 | 33 | 592 | 6 | 591 | 8 | **CNNC(34)+ OCNC(24)+ SCNS(12)** |
| 67 | **(C-C=O)** | 573 | | 14 | 585 | 92 | 577 | 38 | 582 | 189 | **CCO(22)+ NCN(9)+ SNH(16)** |
| 68 | **(C-C=O)** | 570 | | 10 | 578 | 19 | 572 | 15 | 581 | 10 | **CCO(22)+ NCN(6)+ SNH(16)** |
| 69 | **w(SO2)+ w(NH2)** | 532 | | 20 | 548 | 13 | 539 | 15 | 540 | 28 | **NHH(28)+ OSO(34)+ νNS (10)** |
| 70 | **w(SO2)+ w(NH2)** | 531 | | 18 | 540 | 8 | 534 | 2 | 537 | 21 | **NHH(28)+ OSO(34)+ νNS (10)** |
| 71 | **sciss(SO2)** | 470 | | 15 | 474 | 12 | 469 | 1 | 474 | 30 | **OSO(60)+ νNS (5)** |
| 72 | **sciss(SO2)** | 470 | | 21 | 469 | 7 | 467 | 33 | 474 | 12 | **OSO(62)+ νNS (10)** |
| 73 | **ρ (SO2)+ t(NH2)** | 433 | | 14 | 454 | 38 | 432 | 14 | 426 | 2 | **OSO(48)+ CSNH(14)** |
| 74 | **ρ (SO2)+ t(NH2)** | 433 | | 10 | 429 | 7 | 431 | 3 | 426 | 1 | **OSO(49)+ CSNH(14)** |
| 75 | **t(NH2)+ t(SO2)** | 400 | | 10 | 415 | 9 | 394 | 14 | 396 | 15 | **OSO(28)+ NCN(13)+ NCO(7)+CSNH(16)** |
| 76 | **t(NH2)+ t(SO2)** | 400 | | 3 | 389 | 4 | 394 | 3 | 391 | 31 | **OSO(30)+ NCO(6)+CSNH(16)** |
| 77 | **OSO** | 386 | | 1 | 387 | 8 | 384 | 6 | 383 | 0 | **OSO(18)+ CNH(5)** |
| 78 | **OSO** | 384 | | 19 | 383 | 6 | 383 | 7 | 378 | 18 | **OSO(18)+ CNH(9)** |
| 79 | **NCC** | 360 | | 1 | 348 | 2 | 351 | 0 | 355 | 0 | **NCC(48)+ NCN(6)** |
| 80 | **NCC** | 355 | | 0 | 344 | 4 | 348 | 2 | 349 | 10 | **NCC(46)+ NCN(6)** |
| 81 | **t(NH2)** | 316 | | 1 | 354 | 3 | 304 | 4 | 332 | 11 | **NSO(17)+ CSN(5)+ CSNH(16)** |
| 82 | **t(NH2)** | 315 | | 3 | 301 | 4 | 299 | 4 | 329 | 17 | **NSO(19)+ CSNH(17)** |
| 83 | **t(NH2)** | 275 | | 15 | 285 | 6 | 273 | 2 | - | - | **NSO(14)+ CSN(12)+CSNH(29)** |
| 84 | **t(NH2)** | 275 | | 3 | 266 | 4 | 272 | 8 | - | - | **NSO(13)+ CSN(12)+CSNH(25)** |
| 85 | **CSNH** | 243 | | 6 | 247; 136 | 5; 2 | 232 | 12 | 250 | 0 | **NSO(20)+ CSNH(16)** |
| 86 | **CSNH** | 241 | | 12 | 231; 129 | 24; 6 | 228 | 13 | 250 | 0 | **NSO(18)+ ν NS (14)+ CSNH(14)+ SCNN(5)** |
| 87 | **νC-S +CSN** | 237 | | 3 | 238 | 2 | 237 | 1 | 244 | 0 | **CSN(20)+ CS (12)** |
| 88 | **νC-S +CSN** | 233 | | 6 | 235 | 1 | 234 | 1 | 243 | 5 | **CSN(18)+ νCS (14)+ NSO(10)+ SCNN(6)** |
| 89 | **CSN** | 165 | | 0 | 159 | 44 | 162 | 48 | 290;174 | 25;22 | **CSN(25)+ CNH(29)+ SCS(9)** |
| 90 | **CSN** | 163 | | 96 | 157 | 36 | 156 | 42 | 287;173 | 6;0 | **CSN(28)+ CNH(16)+ SCS(10)** |
| 91 | **(C-S)** | 138 | | 6 | 105 | 7 | 128 | 2 | 132 | 2 | **NCNH(25)+ CCNH(32)+ SCNS(16)+ NNCS(9)** |
| 92 | **(C-S)** | 132 | | 1 | 102 | 15 | 127 | 0 | - |  | **CCNH(37)+ SCNS(24)+ NCNH(8)** |
| 93 | **NCNH** | 118 | | 16 | 65 | 2 | 103 | 20 | 145 | 0 | **CCNH(34)+ NCNH(28)+NNCN(10)+CCNH(6)** |
| 94 | **CCNH** | 104 | | 1 | 61;91 | 2;9 | 89 | 2 | 143;134 | 51;2 | **CCNH(42)+ CCNH(26) +NHN(12)** |
| 95 | **νNH +SCS** | 102 | | 0 | 87 | 4 | 93 | 2 | 92 | 2 | **NH (54)+ SCS(20)** |
| 96 | **SCS** | 100 | | 5 | 86 | 1 | 91 | 0 | 109;80 | 3;0 | **NCNH(19)+ SCS(22)+ NHN(6)+ NCNH(6)** |
| 97 | **NCNH** | 93 | | 5 | - |  | 65 | 0 | 95 | 5 | **NCNH(56)+ NNCN(7)** |
| 98 | **νdimer(N-H)** | 88 | | 0 | - |  |  |  | 103;84 | 2;9 | **CNH(22)+NHN(13)**+**νNH(26)+NCNH(13)** |
| 99 | **t(CH3)** | 78 | | 3 | 52 | 0 | 71 | 1 | 111 | 0 | **NCCH(44)+ SCNS(12)** |
| 100 | **t(CH3)** | 62 | | 1 | 46 | 1 | 68 | 2 | 107 | 0 | **NCCH(42)+ NCNH(26)** |
| 101 | **CNH** | 55 | | 0 | - |  | 21 | 2 | 69;32 | 0;2 | **CNH(54)+NHN(10)**+**νNH(10)+NCNH(10)** |
| 102 | **t(CH3)** | 51 | | 1 | 42 | 3 | 50 | 1 | - | - | **NCCH(70)** |
| 103 | **t(CH3)** | 48 | | 1 | 40 | 1 | - | - | - | - | **NCCH(68)+ OCNC(6)** |
| 104 | **νdimer(N-H)** | 38 | | 6 | 17 | 1 | 14 | 0 | 14 | 2 | **νNH(46)+ NHN(7)+ CNH(7)+ NCNH(7)** |
| 105 | **NCSN** | 31 | | 0 | 31 | 4 | 38;28 | 1;1 | 60;18 | 8;0 | **NCNH(35)+ NCSN(42)** |
| 106 | **NCNH** | 13 | | 6 | 22 | 1 | 19 | 8 | 25 | 1 | **NCNH(26)+ NCSN(23)+ NCCH(12)** |
| 107 | **NCSN** | 12 | | 5 | 9 | 0 | 5 | 0 | - | - | **NCSN(57)** |
| 108 | **NCNH** | 9 | | 1 | 5 | 1 | -7 | 1 | - | - | **NCNH(42)+ NCSN(22)** |
|  |  |  | |  |  |  |  |  |  |  |  |

aThe wavenumbers under 1800 cm-1, were scaled with 0.977, and for over 1800 cm-1 the scale factor 0.955 was used. **cal-IR = Calculated IR intensity**

| **Table S4 :** Second order perturbation theory analysis of Fock matrix in NBO basis | | | | |
| --- | --- | --- | --- | --- |
| ***Donor (i)*** | ***Acceptor ( j)*** | ***E(2)a(kcal/mol-1 )*** | ***E(j) _ E(i)b***  ***(a.u.)*** | ***F(i. j)c***  ***(a.u.)*** |
| **Within unit 1** |  |  |  |  |
| **n1(N4)** | **σ(**S1 - C5) | 14.71 | 0.57 | 0.082 |
|  | **σ** (C2 - N3) | 4.87 | 0.94 | 0.061 |
|  | **σ** (C2 - S6) | 0.56 | 0.53 | 0.016 |
|  | **σ** (C5 - N12) | 2.41 | 0.82 | 0.04 |
|  | **σ** (N12 - H13) | 0.7 | 0.81 | 0.022 |
| **n1(N12)** | **σ(**N 4 - C5) | **47.21** | 0.26 | 0.1 |
|  | **σ** (C14 - O15) | **54.82** | 0.28 | 0.114 |
| **π(N4 - C5)** | **π (**C2 - N3) | **14.11** | 0.32 | 0.063 |
|  | **π (**N4 - C5) | 0.62 | 0.31 | 0.013 |
| **σ(N4 - C5)** | **σ(**C5 - N12) | **1.09** | 1.31 | 0.034 |
|  | **σ (**N12 –C14) | **2.06** | 1.31 | 0.047 |
|  |  |  |  |  |
| **From unit 1 to unit 2** |  |  |  |  |
| **n1(N4)** | **σ(**H20 - N21) | **23.34** | 0.84 | 0.126 |
| **n1(N12)** | **σ(**C22 - N25) | 0.08 | 0.23 | 0.004 |
| **CR(N4)** | **σ (**N20 –H21) | **0 .37** | 14..62 | 0 .067 |
| **From unit 2 to unit 1** |  |  |  |  |
| **n1(N25)** | **σ (**N12 –H13) | **23 .34** | 0 .84 | 0 .126 |
| **CR(N25)** | **σ (**N12 –H13) | **0 .37** | 14 .62 | 0 .067 |
|  |  |  |  |  |
| **Within unit 2** |  |  |  |  |
| **n1(N25)** | **σ (**H20 –N21) | 0.54 | 0.84 | 0.019 |
|  | **σ (**C22 –S24) | 12.61 | 0.58 | 0.078 |
| **n1(N21)** | **σ (**C22 –N25) | 59.80 | 0.23 | 0.106 |
|  | **σ (**C23 –O26) | 55.19 | 0.28 | 0.114 |
| aE(2) means energy of hyper conjugative interaction (stabilization energy). bEnergy difference between donor (i) and acceptor (j) NBO orbitals. c F(i, j) is the fork matrix element between i and j NBO orbitals. | | | | |

| **Table S5**: Occupation number of the interacting NBOs with their respective energies. | | | | | | |
| --- | --- | --- | --- | --- | --- | --- |
| ***Parameters*** | ***Occupancy (e)*** | | | ***Energy (a.u)*** | | |
|  | ***Monomer*** | ***Dimer*** | ***Occ*** | ***Monomer*** | ***Dimer*** | ***E*** |
| **n1(N4)** | 1.90800 | 1.87293 | -0.03507 | -0.42754 | -0.44727 | -0.01973 |
| **σ (**N12 –H13) | 0.01737 | 0.07036 | **0.05299** | 0.38151 | 0.38837 | 0.00686 |
| **σ (**C5 –N4) | 0.02582 | 0.02873 | **0.00291** | 0.50030 | 0.47587 | -0.02443 |
| **π  (**C5 –N4) | 0.38443 | 0.42480 | **0.04037** | -0.05551 | -0.07579 | -0.02028 |
| **n1(N25)** | 1.90800 | 1.87293 | -0.03507 | -0.42754 | -0.44727 | -0.01973 |
| **σ (**N21 –H20) | 0.01737 | 0.07035 | **0.05298** | 0.38151 | 0.38837 | 0.00686 |
